# Supplementary material for: Pharmaceutical care for patients with breast and ovarian cancer
Source: Springer Nature journal article supplement (doi:10.1007/s00520-012-1385-z), 2012-02-01
Supplement: MOESM1 [file 8572876]

## **Online Resources**

**Title:** Pharmaceutical Care for Patients with Gynaecological Malignancies

**Journal:** Supportive Care in Cancer

**Authors:** Andrea Liekweg, Martina Westfeld, Michael Braun, Oliver Zivanovic, Tania Schink, Walther Kuhn, Ulrich Jaehde

**Affiliations:** Department of Clinical Pharmacy, University of Bonn, An der Immenburg 4, 53121 Bonn, Germany; Center for Integrated Oncology (CIO), Department of Obstetrics and Gynaecology, University of Bonn, Sigmund-Freud-Str. 25, 53127 Bonn, Germany; Department of Clinical Epidemiology, Bremen Institute for Prevention Research and Social Medicine, Achterstr. 30, 28359 Bremen, Germany

### **Corresponding author:**

Prof. Dr. Ulrich Jaehde, Institute of Pharmacy, Clinical Pharmacy, University of Bonn, An der Immenburg 4, D-53121 Bonn

Tel.: +49-228-73 5252, Fax: +49-228-73 9757, E-mail: u.jaehde@uni-bonn.de

Online resource 1: Absolute change of quality of life from baseline to the middle of chemotherapy

|                           | Control group |        |             | Intervention group |        |             |         |
|---------------------------|---------------|--------|-------------|--------------------|--------|-------------|---------|
|                           | n             | Median | Quartiles   | n                  | Median | Quartiles   | p value |
| <b>Global Health</b>      | 44            | -12.5  | -28.1; 0    | 50                 | 0      | -16.7; 8.3  | 0.007   |
| <b>Functioning scales</b> |               |        |             |                    |        |             |         |
| Physical functioning      | 42            | 0      | -20.0; 1.7  | 48                 | 0      | -13.3; 6.7  | 0.457   |
| Role functioning          | 43            | 0      | -33.3; 0    | 48                 | 0      | -29.2; 16.7 | 0.579   |
| Emotional functioning     | 41            | 0      | -16.7; 20.8 | 48                 | 8.3    | -8.3; 25.0  | 0.214   |
| Cognitive functioning     | 43            | 0      | -16.7; 0    | 49                 | 0      | -33.3; 0    | 0.473   |
| Social functioning        | 44            | 0      | -16.7; 0    | 49                 | 0      | -16.7; 16.7 | 0.004   |
| <b>Symptom scales</b>     |               |        |             |                    |        |             |         |
| Fatigue                   | 41            | 22.2   | 11.1; 44.4  | 50                 | 11.1   | 0; 44.4     | 0.264   |
| Nausea and Vomiting       | 45            | 16.7   | 0; 50.0     | 50                 | 16.7   | 0; 16.7     | 0.033   |
| Pain                      | 43            | 0      | 0; 33.3     | 50                 | 0      | -33.3; 0    | 0.008   |
| Dyspnoea                  | 43            | 0      | 0; 33.3     | 50                 | 0      | 0; 33.3     | 0.944   |
| Insomnia                  | 45            | 0      | 0; 33.3     | 49                 | 0      | -33.3; 0    | 0.266   |
| Appetite loss             | 46            | 33.3   | 0; 66.7     | 50                 | 0      | 0; 33.3     | 0.005   |
| Constipation              | 43            | 0      | 0; 66.7     | 49                 | 0      | 0; 50.0     | 0.642   |
| Diarrhoea                 | 44            | 0      | 0; 0        | 50                 | 0      | 0; 0        | 0.811   |
| Financial difficulties    | 45            | 0      | 0; 33.3     | 48                 | 0      | 0; 0        | 0.012   |
